# Supplementary material
Source: PubMed Central journal article supplement (PMC4556358)
Supplement: NIHMS711757-supplement-Supplement1.pdf [file NIHMS711757-supplement-Supplement1.pdf]

## Supplementary Appendix

This appendix has been provided by the authors to give readers additional information about their work.

Supplement to: Whelan TJ, Olivotto IA, Parulekar WR, et al. Regional nodal irradiation in early-stage breast cancer. *N Engl J Med* 2015;373:307-16. DOI: 10.1056/NEJMoa1415340

**Table of Contents**  
**Supplementary Appendix**

|                                                                                                               |           |
|---------------------------------------------------------------------------------------------------------------|-----------|
| <b>MA.20 Study Investigators.....</b>                                                                         | <b>2</b>  |
| <b>NCIC CTG Cooperative Group Staff .....</b>                                                                 | <b>5</b>  |
| <b>Participating Cooperative Groups .....</b>                                                                 | <b>5</b>  |
| <b>Ineligibility criteria .....</b>                                                                           | <b>5</b>  |
| <b>Planning details for whole breast irradiation.....</b>                                                     | <b>6</b>  |
| <b>Radiation Quality Assurance.....</b>                                                                       | <b>6</b>  |
| <b>Follow-up .....</b>                                                                                        | <b>7</b>  |
| <b>Censoring.....</b>                                                                                         | <b>7</b>  |
| <b>Figure S1. CONSORT Diagram for Randomization, Treatment and Follow-up.....</b>                             | <b>8</b>  |
| <b>Figure S2. Hazard Ratios for Overall Survival in Subgroups of Patients.....</b>                            | <b>9</b>  |
| <b>Figure S3. Cause Specific Mortality by Treatment Assignment .....</b>                                      | <b>10</b> |
| <b>Figure S4. Cumulative Incidence of Isolated Locoregional Recurrence (ILR) by Treatment Assignment.....</b> | <b>11</b> |
| <b>Figure S5. Cumulative Incidence of Distant Recurrence (DR) by Treatment Assignment .</b>                   | <b>12</b> |
| <b>Table S1. Baseline Characteristics of Patients (No. and %) .....</b>                                       | <b>13</b> |

## **MA.20 Study Investigators**

**Canada:** Atlantic Health Sciences Corporation: Nancy Grant; BC Cancer Agency (BCCA)-Fraser Valley Centre: Winkle Kwan, Carson Leong, Susan Balkwill, Don C. Wilson, Hannah Carolan, Valeri Goutsouliak; BCCA-Vancouver Centre: Scott Tyldesley, Peter Lim, Lorna Weir, Christina F. Aquino-Parsons, Gillian Campbell, Mira Keyes, Karen Gelmon; BCCA-Vancouver Island Centre: Ivo Olivotto, Pauline Truong, Elaine Wai, Hosam Kader, Paul A. Blood, Skaria Alexander; CHUM-Hopital Notre-Dame: Isabelle Roy, Jean-Pierre Guay, Pierre Del Vecchio, Marjory Jolicoeur, Francis Methot, Jose Ayllon, Sophie Lavertu, Marie-Andree Fortin, Pierre Rousseau; CHUQ-Pavillon Hotel-Dieu de Quebec: Isabelle Germain, Marie Larochelle-Beland, Isabelle Vallieres, Lucie Blondeau, Jacques Laverdiere, Anne Dagnault, Paul-Emile Raymond, Andre Fortin; CancerCare Manitoba: James Butler, Mohamed A. M. Akra, Andrew L. Cooke; Centre hospitalier universitaire de Sherbrooke: Abdenour Nabid, Rachel Bujold, Olivier Ballivy, Gilles Prevot; Cross Cancer Institute: Susan Chafe, Diane Severin, Alan Lees, Keith Tankel, Nirmal Mehta, Bassam Abdulkarim, John Oliver Amanie, Tirath Nijjar; Dr. H. Bliss Murphy Cancer Centre: Jonathan Greenland; Grand River Regional Cancer Centre at Grand River Hospital: Vasanth R. Basrur, Darindra Gopaul; Juravinski Cancer Centre at Hamilton Health Sciences: Timothy J. Whelan, Ian S. Dayes, Barbara Strang, Harold I. Reiter, Jonathan Sussman, James R. Wright, Sachi M. Voruganti, Ian Hodson, William G. McMillan, Mark Levine; London Regional Cancer Program: Olga Vujovic, Michael I. Lock, David D'Souza, Francisco Perera, Nancy Read, Edward Yu; McGill University-Department of Oncology: Christine Lambert, Marie Duclos, Lorraine Portelance, Marc David, George Shenouda, David Melnychuk, Khalil Sultanem; Niagara Health System: Janice Giesbrecht, Richard H. F. Shao, Brian Findlay; Northeastern Ontario Cancer Center: Julie Bowen, Randall J. Bissett, David Want,

Sarwat Shehata; Odette Cancer Centre Sunnybrook Health Sciences Centre: Ida Ackerman, Lawrence Paszat, Veronique Benk, Ewa Szumacher, May Tsao, Jean-Philippe Pignol, Eileen Rakovitch, Jacqueline Spayne, Gregory Czarnota, Anna Maria Wojcicka, Edward L. Chow, Kathleen Pritchard; Ottawa Health Research Institute: Joanne Meng, Jean-Michel Caudrelier, Laval J. Grimard, Catherine Lochrin, Bhavani D. Nair, Peter Cross; QEII Health Sciences Cancer Centre: Dorianne Rheume, Wladyslawa Cwajna, Robert D. H. Rutledge, Maureen Nolan; Saskatoon Cancer Centre: Ali El-Gayed, David P. Skarsgard; The Vitalite Health Network-Dr. Leon Richard Oncology Centre: Andree Lirette, Fernando Rojas, Linda Leblanc; Thunder Bay Regional Health Science Centre: Conrad Falkson, Margaret L. Anthes; Tom Baker Cancer Centre: Peter Craighead, Theresa Trotter, Jack Mackinnon, Siraj Husain, Gregory McKinnon; University Health Network-Princess Margaret Hospital: Katherine Vallis, Lee Manchul, Woodrow A. Wells, Anthony Fyles, Fei-Fei Liu, Wilfred Levin, John Cho, Gabrielle Kane, Anne Koch, David McCready.

**Australia:** Austin Health: Malcolm Feigan; Campbelltown Hospital: George Papadatos, Denise Lonergan; East Coast Cancer Centre: Helen Peres; Liverpool Hospital: Geoff Delaney; Mater QRI: Judith Cox, Guy Bryant; Newcastle Mater Misericordiae Hospital: Peter O'Brien, Jane Ludbrook, M. Kumar; Peter MacCallum Cancer Centre: Boon Chua, David Blakey, Claire Phillips, Michelle Bishop, Sam Guglani, Roslyn Drummond, Maree Sexton; Princess Alexandra Hospital: Margot Lehman, Jennifer Harvey; Royal Adelaide Hospital: Raghu Gowda, Michael Penniment, Scott Carruthers; Royal Perth Hospital: Margaret Latham; Sir Charles Gairdner Hospital: David Joseph, M. Taylor, Nigel Spry; St. George Hospital: Peter Graham; Westmead Hospital: Verity Ahern.

USA: Allegheny General Hospital: David Parda; All Saints Cancer Center: James Taylor; Alta Bates Hospital: Berna Roig, Lorraine Champion; Boca Raton Regional Hospital: Rashmi Benda, Michael Kasper; Breslin Cancer Center/Great Lakes Institute: Janaki Moni; Cancer Physicians Associated: Yadvindera Bains; Christian Hospital Cancer Care Center: Timothy Rearden; Columbia St. Mary's: Carl Olson, Craig Schultz; Columbus CCOP: Lawrence Berk, Mark Becker; Danville Regional Medical Center: Peter Leider; Flower Memorial Hospital: William Mueller; Froedtert and the Medical College of Wisconsin: Julia White; John H. Stroger Jr. Hospital of Cook County: Howard Zaren; LDS Hospital: R. Lee, Vilija Avizonis; Mayo Clinic Rochester: Ivy Petersen; Mayo Clinic Jacksonville: Laura Vallow, Winston Tan, Steven Buskirk; Memorial Hospital Colorado Springs: Jane Ridings; MeritCare Clinic-Bemidji: John Bollinger; Northern Indiana Research Consortium: Nina Johnson; Rochester General Hospital: Alberto Daconceicao, William Casey; Roswell Park Cancer Institute: Michael Kuettel, Johnny Yap, Naoyuki Saito; Saint Joseph Mercy Hospital: David Pruitt, Salam Jafar; St. Vincent Hospital: Linda Gemer; Sarasota Oncology Center: Dale Lakomy; Sparrow Hospital: James Herman; Suburban Hospital: Susan Stinson; University of Chicago: Steven Chmura; University of Michigan: Lori Pierce; University of Southern California: Oscar Streeter; University of Washington Medical Center: Waylene Wang, Michelle Yao; W. A. Foote Memorial Hospital: Julie Soriano; Waukesha Memorial Hospital: Wingate Clapper, James Jones, James Richardson; Wayne State University-Karmanos Cancer Institute: Jeffrey Forman, Harry Kim, Tara Washington.

### **NCIC CTG Cooperative Group Staff**

Yvonne Murray, Eliot Frymire, Liting Zhu, Anne Fisher, Bingshu Chen (Senior Biostatistician), Judy-Anne Chapman (Senior Biostatistician), Lois Shepherd (Senior Investigator), and Wendy Parulekar (Senior Investigator).

### **Participating Cooperative Groups**

Participating centres include those associated with the NCIC Clinical Trials Group (NCIC CTG), National Surgical Adjuvant Breast and Bowel Project (NSABP), North Central Cancer Treatment Group (NCCTG), Radiation Therapy Oncology Group (RTOG), Southwest Oncology Group (SWOG), and Trans Tasman Radiation Oncology Group (TROG).

### **Ineligibility criteria**

Patients were ineligible from the trial for the following reasons: (1) the clinical evidence of T4 or N2-3 disease prior to surgery; (2) residual clinical disease in the axilla following dissection; (3) presence of a serious non-malignant disease (e.g. systemic lupus erythematosus, scleroderma, cardiovascular or pulmonary disease) which would preclude definitive radiation therapy; (4) currently pregnant or lactating; (5) concurrent or previous malignancies; (6) psychiatric or addictive disorders, which precluded obtaining informed consent or adherence to protocol; and (7) inability to receive radiotherapy within 8 weeks of completing adjuvant chemotherapy or within 16 weeks after the last surgical breast procedure for patients receiving endocrine therapy only.

### **Planning details for whole breast irradiation**

For patients assigned to whole breast irradiation (WBI), the aim was to treat the breast with a parallel opposed pair of fields tangentially arranged across the chest. Standard borders were recommended: medial border – mid-sternum, lateral border – mid-axillary line, superior border – below the clavicle, and the inferior border – 1-1.5 cm below the infra-mammary crease. CT planning was recommended. Patients were treated with 4-18 megavoltage radiation in the supine position with the arm abducted. Wedges or compensators were used to ensure uniform dose of +/- 7%. The dose was prescribed at a point mid-separation  $\frac{2}{3}$  the distance between the skin and the base of the tangents. Treatment beam images were obtained to confirm adequate coverage.

### **Radiation Quality Assurance**

MA.20 employed an extensive quality assurance program to confirm that patients were treated in compliance with the protocol. This included: (1) a review of treatment centres' facilities and practice run – prior to initiating the study, each centre was asked to plan a patient using the experimental technique described in the protocol. Copies of the treatment prescription, calculation sheets, isodose distributions, and digitally reconstructed radiographs were couriered to one of two central review centres to confirm if the patient could be treated in compliance with the protocol; (2) real-time review – each centre was asked to send similar information on the first 25 patients randomized in the trial. Any deviations from protocol observed were communicated to the treatment centre with suggestions to modify treatment accordingly. When centres had documented their 15<sup>th</sup> consecutive patient could be treated with no protocol deviations, real-time review was no longer required; and (3) final review – for patients who did not complete real-time review, similar information as above (treatment prescription, isodose distribution, etc.) was reviewed upon completion of treatment.

## **Follow-up**

Follow-up visits occurred during the last week of radiotherapy, at month 3 and 9 after the last dose of radiotherapy, then every 6 months for two years, and then annually. At each visit, a history and physical were performed and adverse events were assessed by the NCI Common Toxicity Criteria version 2. Mammograms were performed 6 months after radiotherapy and then annually.

## **Censoring**

Overall survival (OS) was defined as time from randomization to death from any cause; censoring was at last contact. Disease-free survival (DFS) was defined as time from randomization to time of first recurrence in the ipsilateral breast, nodal or distant sites, contralateral breast cancer or breast cancer death: censoring was at last contact or non breast cancer death. Isolated locoregional disease-free survival (ILDFS) was defined as time from randomization to time of first recurrence of cancer in the ipsilateral breast, axillary, supraclavicular, or internal mammary nodes without evidence of distant disease within one month. Data was censored at the time of distant recurrence as a first recurrence or within 30 days, last contact, or non breast death, which ever occurred first. Distant disease-free survival (DDFS) was defined as time from randomization to time of recurrence at a distant site (bone, liver, lung or CNS) or breast cancer death. Data was censored at last contact or non breast death.



**Figure S1. CONSORT Diagram for Randomization, Treatment and Follow-up**

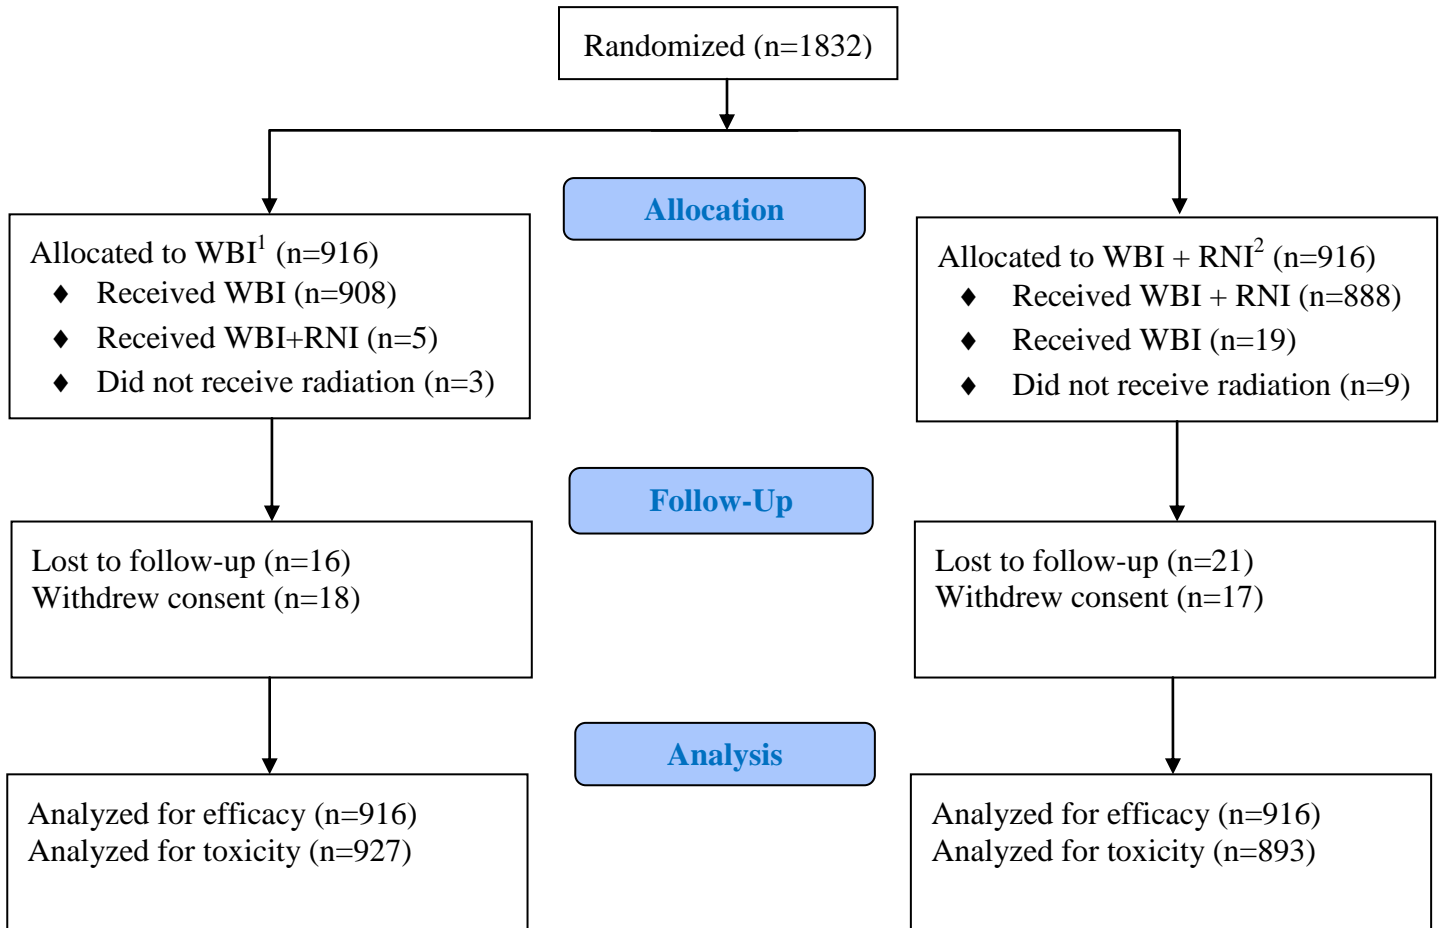

For patients who were lost to follow-up or withdrew consent, data on disease recurrence and death was included to that point in time.

<sup>1</sup> WBI – whole breast irradiation; <sup>2</sup> WBI + RNI – whole breast irradiation + regional nodal irradiation.

**Figure S2. Hazard Ratios for Overall Survival in Subgroups of Patients**

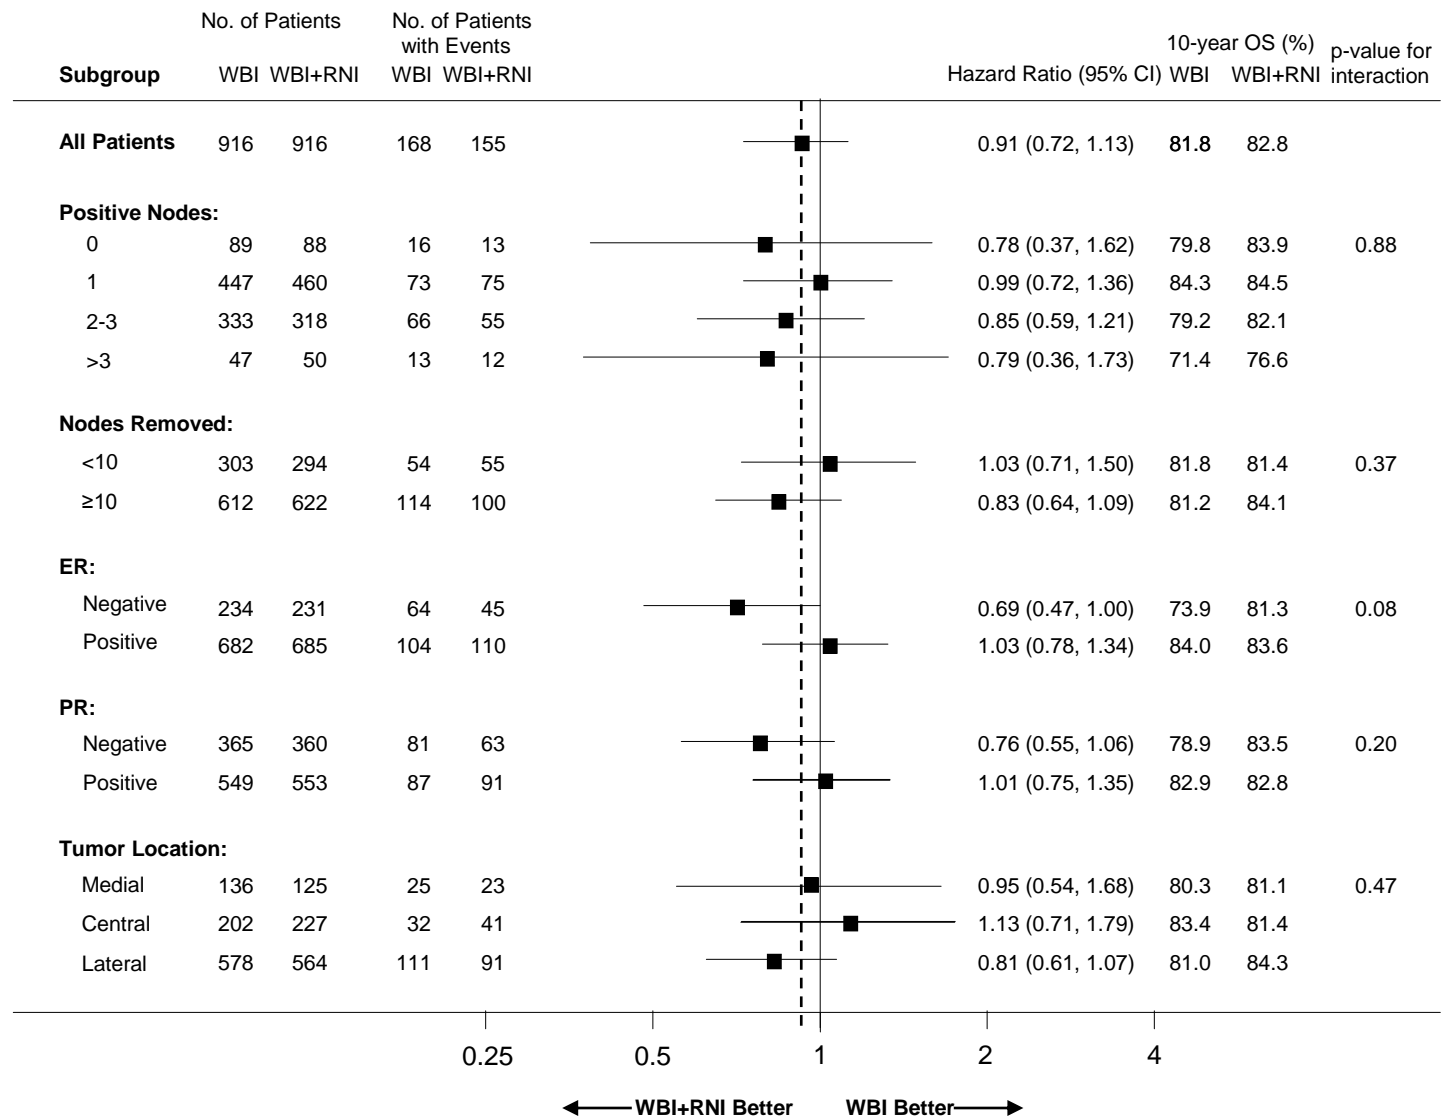

The dotted line at 0.91 indicates the overall hazard ratio estimate. The x-axis is scaled according to the logarithm of the hazard ratio.

Figure S3. Cause Specific Mortality by Treatment Assignment

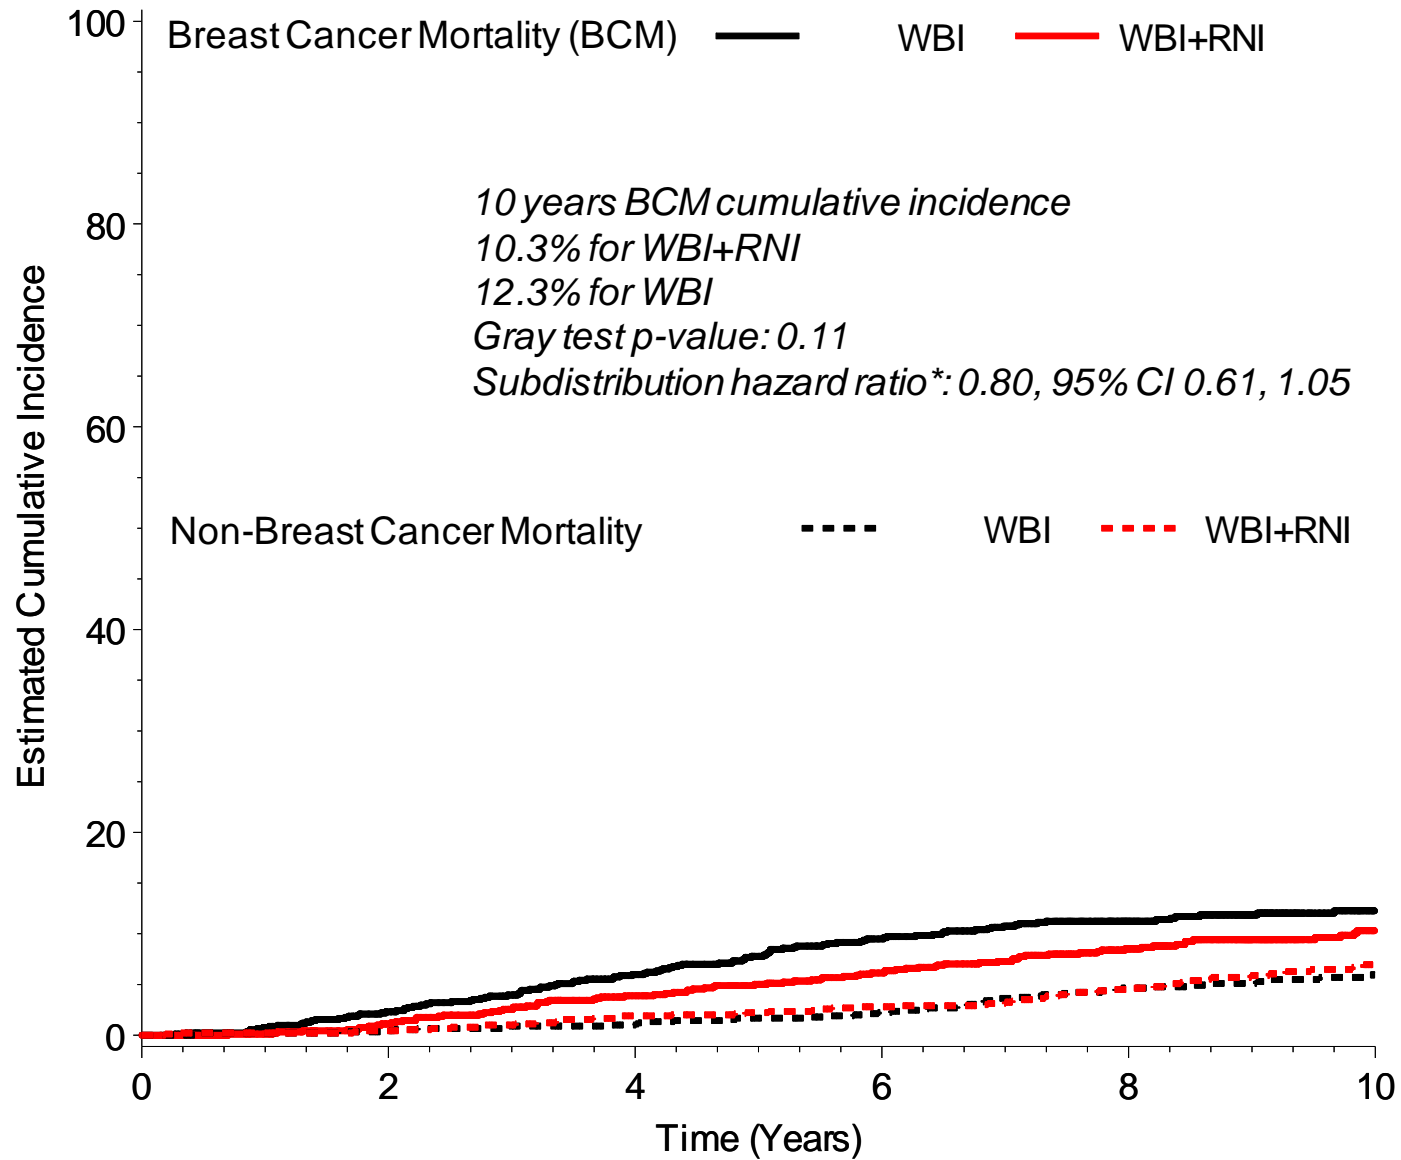

\*based on Fine JP and Gray RJ (1999) A proportional hazards model for the subdistribution of a competing risk. *JASA* 94:496-509.

**Figure S4. Cumulative Incidence of Isolated Locoregional Recurrence (ILR) by Treatment Assignment**

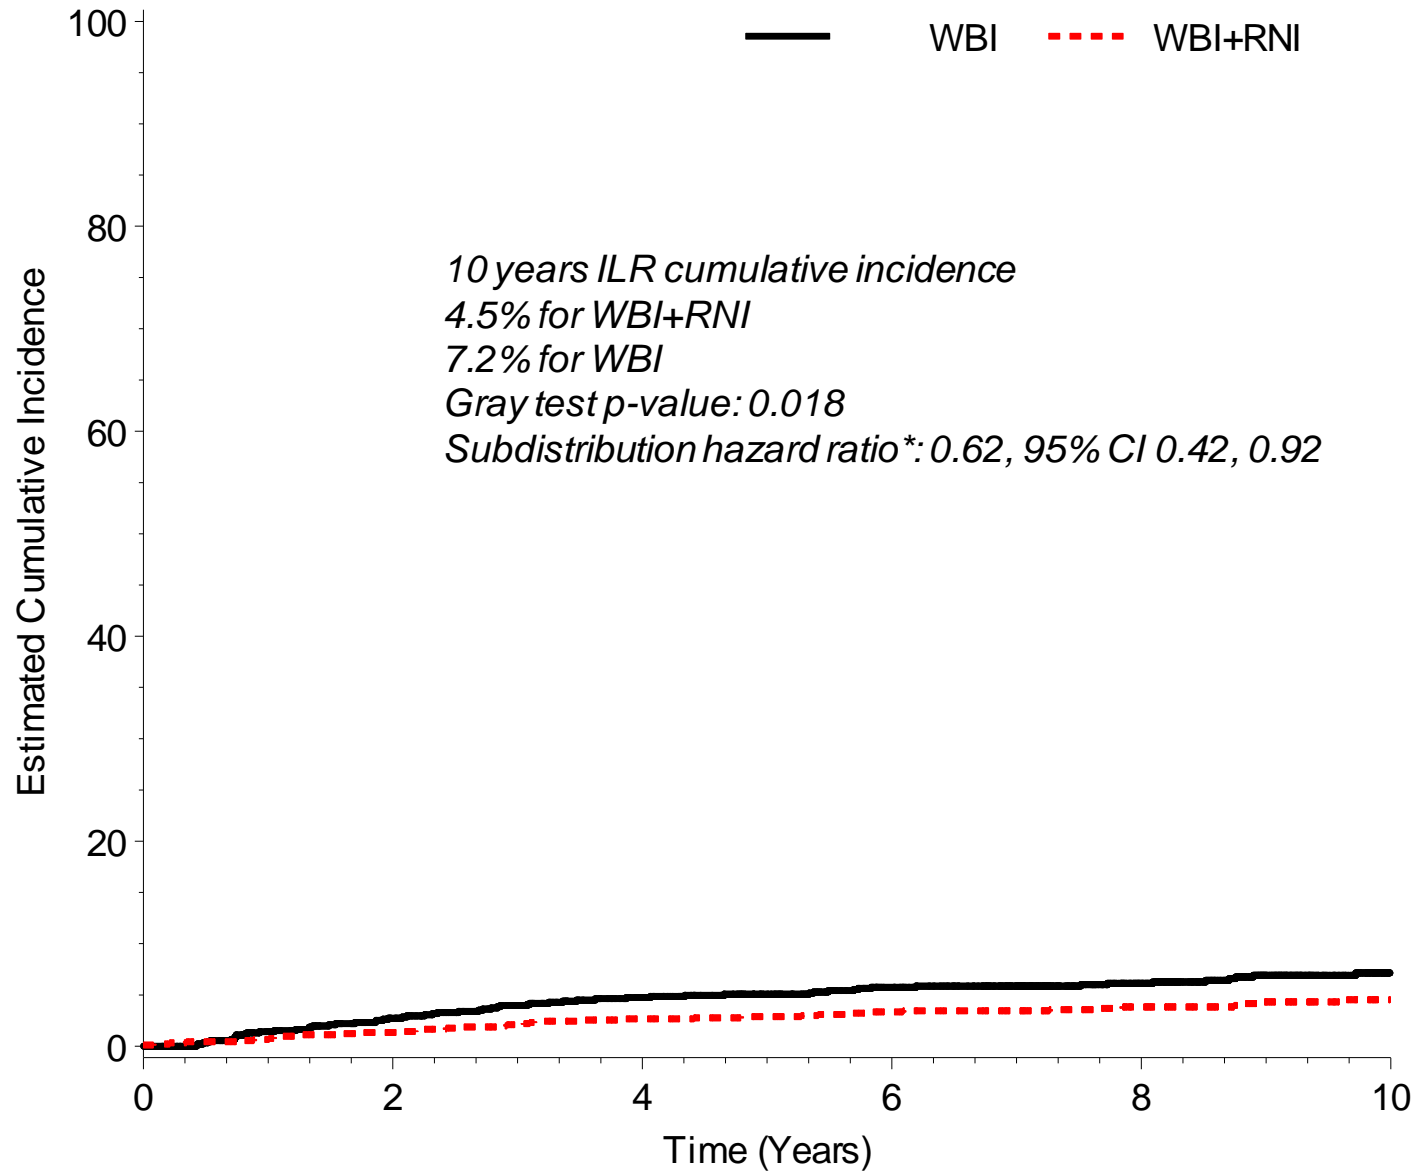

*\*based on Fine JP and Gray RJ (1999) A proportional hazards model for the subdistribution of a competing risk. JASA 94:496-509.*

Figure S5. Cumulative Incidence of Distant Recurrence (DR) by Treatment Assignment

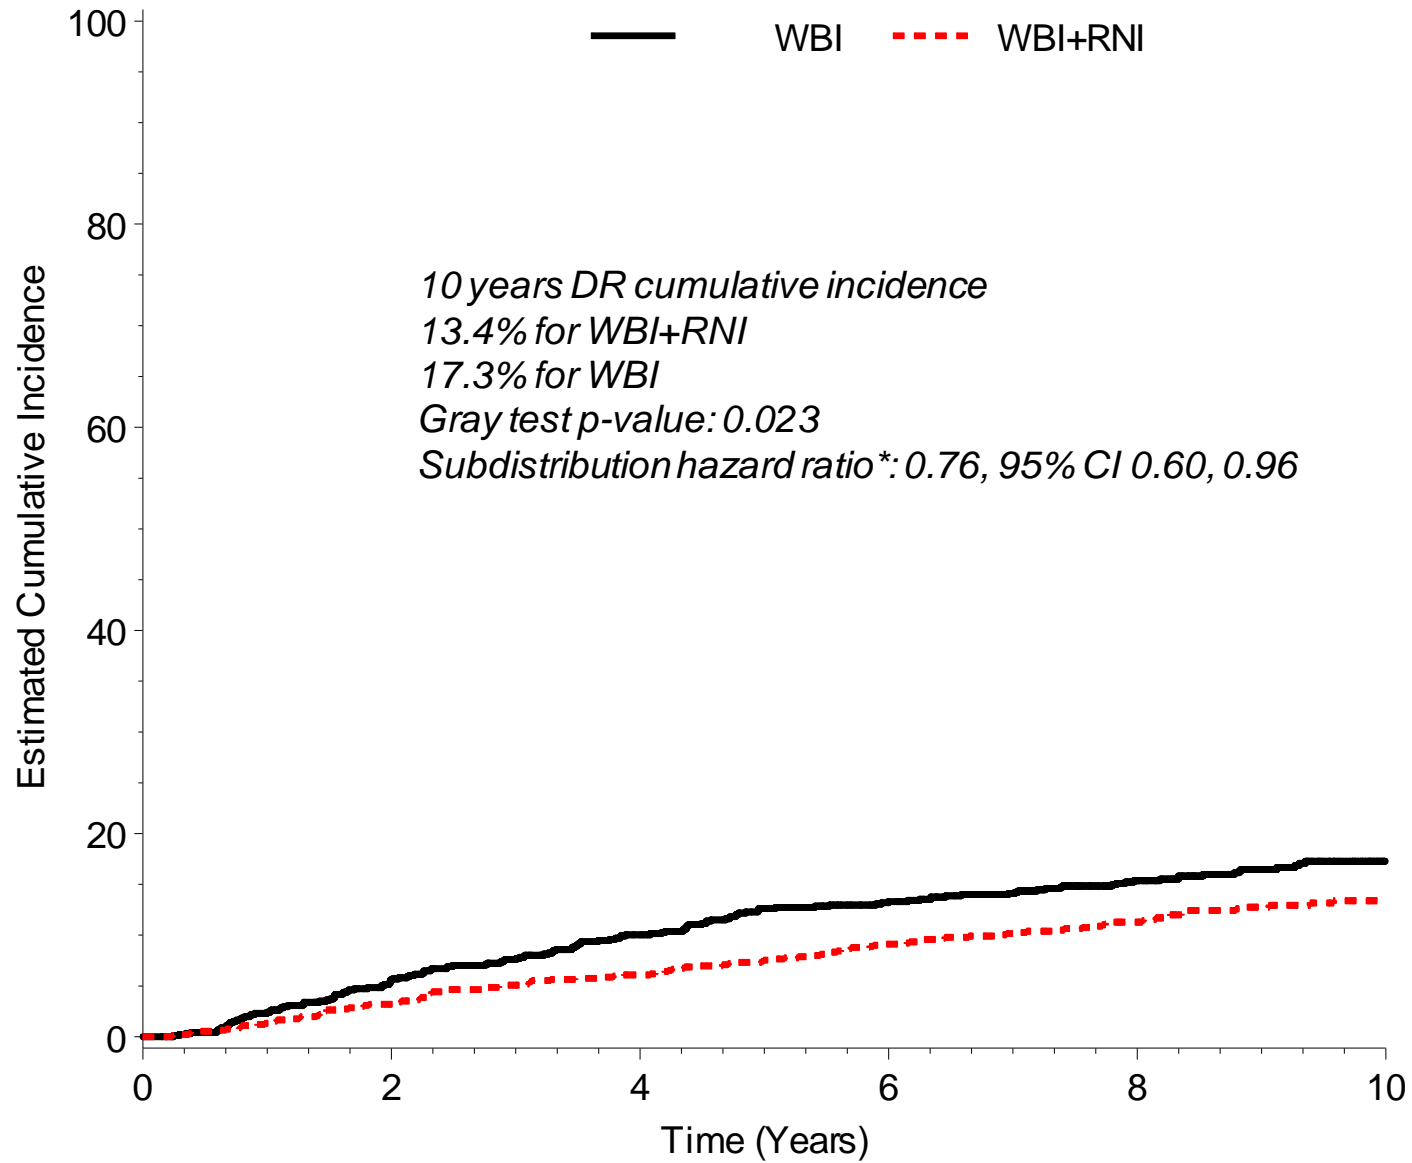

\*based on Fine JP and Gray RJ (1999) A proportional hazards model for the subdistribution of a competing risk. *JASA* 94:496-509.

**Table S1. Baseline Characteristics of Patients (No. and %)**

| <b>Characteristic</b>                           | <b>WBI<br/>N (%)<br/>916 (100)</b> | <b>WBI+RNI<br/>N (%)<br/>916 (100)</b> |
|-------------------------------------------------|------------------------------------|----------------------------------------|
| Age                                             |                                    |                                        |
| Median (Range) - yr                             | 53 (26,84)                         | 54 (29,84)                             |
| Initial sentinel lymph node biopsy <sup>1</sup> | 357 (39)                           | 360 (39)                               |
| Axillary nodes removed                          |                                    |                                        |
| Median (Interquartile range)                    | 12 (8,16)                          | 12 (9,16)                              |
| 1-9                                             | 303 (33)                           | 294 (32)                               |
| ≥ 10                                            | 612 (67)                           | 622 (68)                               |
| Missing                                         | 1 (0)                              | 0 (0)                                  |
| Positive axillary nodes                         |                                    |                                        |
| None                                            | 89 (10)                            | 88 (10)                                |
| 1                                               | 447 (49)                           | 460 (50)                               |
| 2                                               | 233 (25)                           | 209 (23)                               |
| 3                                               | 100 (11)                           | 109 (12)                               |
| > 3                                             | 47 (5)                             | 50 (5)                                 |
| Tumor size                                      |                                    |                                        |
| ≤ 2 cm                                          | 501 (55)                           | 459 (50)                               |
| 2.1-5 cm                                        | 409 (45)                           | 443 (48)                               |
| > 5 cm                                          | 6 (1)                              | 13 (1)                                 |
| Missing                                         | 0 (0)                              | 1 (0)                                  |
| Lymphovascular invasion                         |                                    |                                        |
| Absent                                          | 492 (54)                           | 505 (55)                               |
| Present                                         | 381 (42)                           | 378 (41)                               |
| Missing                                         | 43 (5)                             | 33 (4)                                 |
| SBR Tumor grade                                 |                                    |                                        |
| I-II                                            | 523 (57)                           | 517 (56)                               |
| III                                             | 387 (42)                           | 391 (43)                               |
| Missing                                         | 6 (0.7)                            | 8 (0.9)                                |
| Estrogen receptor status                        |                                    |                                        |
| Positive                                        | 682 (74)                           | 685 (75)                               |
| Negative                                        | 234 (26)                           | 231 (25)                               |

| Characteristic                            | WBI<br>N (%)<br><b>916 (100)</b> | WBI+RNI<br>N (%)<br><b>916 (100)</b> |
|-------------------------------------------|----------------------------------|--------------------------------------|
| Progesterone receptor status              |                                  |                                      |
| Positive                                  | 549 (60)                         | 553 (60)                             |
| Negative                                  | 365 (40)                         | 360 (39)                             |
| Missing                                   | 2 (0)                            | 3 (0)                                |
| Adjuvant chemotherapy                     |                                  |                                      |
| High dose anthracycline (e.g., CEF, FEC)  | 357 (39)                         | 334 (37)                             |
| Anthracycline + taxane (e.g., ACT, FEC-D) | 244 (27)                         | 230 (25)                             |
| Anthracycline/no taxane (e.g., AC)        | 183 (20)                         | 220 (24)                             |
| Other (e.g., CMF)                         | 45 (5)                           | 47 (5)                               |
| No chemotherapy                           | 87 (9)                           | 85 (9)                               |
| Adjuvant endocrine therapy <sup>2</sup>   |                                  |                                      |
| Aromatase Inhibitor <sup>3</sup>          | 529 (58)                         | 521 (57)                             |
| Tamoxifen                                 | 167 (18)                         | 172 (19)                             |
| No endocrine therapy                      | 220 (24)                         | 223 (24)                             |
| Boost irradiation <sup>4</sup>            |                                  |                                      |
| Yes                                       | 317 (35)                         | 294 (32)                             |

<sup>1</sup> Only 35 patients in WBI arm and 33 patients in WBI + RNI had a sentinel lymph node biopsy only.

<sup>2</sup> Endocrine therapy was initiated following radiation therapy in some patients.

<sup>3</sup> Aromatase inhibitor used solely or following Tamoxifen.

<sup>4</sup> Boost irradiation was delivered after WBI or WBI + RNI.
